# Supplementary material for: Lipidomic Profiling of the Olive (Olea europaea L.) Fruit towards Its Valorisation as a Functional Food: In-Depth Identification of Triacylglycerols and Polar Lipids in Portuguese Olives
Source: PubMed Central journal article supplement (PMC6680557; doi:10.3390/molecules24142555), 2019-07-13
Supplement: molecules-24-02555-s001.pdf [file molecules-24-02555-s001.pdf]

## Supplementary Material for

Lipidomic profiling of the olive (*Olea europaea* L.) fruit towards its valorisation as a functional food: in-depth identification of triacylglycerols and polar lipids in Portuguese olives

Eliana Alves<sup>1,\*</sup>, Tânia Melo<sup>1,2</sup>, Madalena P. Barros<sup>3</sup>, M. Rosário M. Domingues<sup>1,2,\*</sup>, Pedro Domingues<sup>1</sup>

<sup>1</sup>Mass Spectrometry Centre, Department of Chemistry & QOPNA & LAQV-REQUIMTE, University of Aveiro, Campus Universitario de Santiago, 3810-193 Aveiro, Portugal

<sup>2</sup>Department of Chemistry & CESAM & ECOMARE, University of Aveiro, Campus Universitario de Santiago, 3810-193 Aveiro, Portugal

<sup>3</sup>Cooperativa de Olivicultores de Nelas, C.R.L., Zona Industrial de Nelas, 3520-095 Nelas, Portugal

\* Corresponding authors: Dr. Eliana Alves E-mail: elianaalves@ua.pt; Prof. M. Rosário M. Domingues (mrd@ua.pt)

### Contents

|                                                                                                                                                                                                                                                                                                                                                                                                                                                                                                                                                                                                                                      |    |
|--------------------------------------------------------------------------------------------------------------------------------------------------------------------------------------------------------------------------------------------------------------------------------------------------------------------------------------------------------------------------------------------------------------------------------------------------------------------------------------------------------------------------------------------------------------------------------------------------------------------------------------|----|
| Figure S1) Base peak chromatogram of neutral lipid-rich fraction of the olive ( <i>Olea europaea</i> L. cv. <i>Galega vulgar</i> ) pulp in positive-ion mode obtained by C <sub>30</sub> -RP-HPLC-ESI-orbitrap-MS. ....                                                                                                                                                                                                                                                                                                                                                                                                              | 3  |
| Table S1) List of triacylglycerols (TAG) identified in the olive ( <i>Olea europaea</i> L. cv. <i>Galega vulgar</i> ) pulp by C <sub>30</sub> -RP-HPLC-ESI-orbitrap-MS and C <sub>30</sub> -RP-HPLC-ESI-orbitrap-MS with the fatty acyl composition considering the different possible combinations of the fatty acids.....                                                                                                                                                                                                                                                                                                          | 4  |
| Table S2) List of polar lipids (phospholipids, glyceroglycolipids, glycosphingolipids and betaines) identified in the olive ( <i>Olea europaea</i> L. cv. <i>Galega vulgar</i> ) pulp by HILIC-LC-orbitrap-MS and HILIC-LC-orbitrap-MS/MS.....                                                                                                                                                                                                                                                                                                                                                                                       | 10 |
| Figure S2) LC-MS/MS spectra of two molecular species of triacylglycerol identified in the olive ( <i>Olea europaea</i> L. cv. <i>Galega vulgar</i> ) pulp in the positive ion mode as [M+NH <sub>4</sub> ] <sup>+</sup> ions, bearing unusual fatty acids. In this MS/MS spectrum of TAG(53:3), several neutral losses of the acyl chains as RCOOH+NH <sub>3</sub> ions are seen, including neutral losses of the unusual odd-fatty acids 15:1, 17:1 and 19:1. In this MS/MS spectrum of TAG(48:3), neutral losses of the acyl chains of unusual odd- and polyunsaturated fatty acids are seen, as 15:1 and 16:2, respectively. .... | 15 |

Figure S3) LC-MS/MS spectra of two molecular species of phosphatidylcholine (PC) identified in the olive (*Olea europaea* L. cv. *Galega vulgar*) pulp in the negative ion mode as  $[M+CH_3COO]^-$  ions, bearing unusual fatty acids. In the MS/MS spectrum of PC(36:3(OH)) on the left, the carboxylate anions corresponding to the fatty acids C18:1 at  $m/z$  281.24, C18:2 at  $m/z$  279.23, C18:2(OH) at  $m/z$  295.22 and C18:1(OH) at  $m/z$  297.24 are seen. In the MS/MS spectrum of PC(26:2) on the right, the carboxylate anions corresponding to the fatty acids C8:1 at  $m/z$  141.09 and C18:1 at  $m/z$  281.24 are seen..... 16

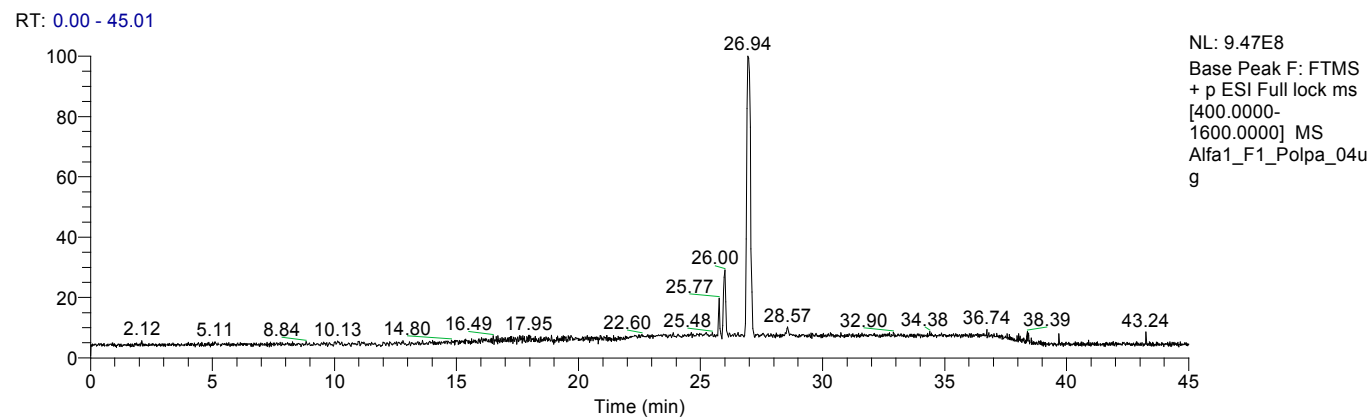

**Figure S1)** Base peak chromatogram of neutral lipid-rich fraction of the olive (*Olea europaea* L. cv. *Galega vulgar*) pulp in positive-ion mode obtained by C<sub>30</sub>-RP-HPLC-ESI-orbitrap-MS.

**Table S1)** List of triacylglycerols (TAG) identified in the olive (*Olea europaea* L. cv. *Galega vulgar*) pulp by C<sub>30</sub>-RP-HPLC-ESI-orbitrap-MS and C<sub>30</sub>-RP-HPLC-ESI-orbitrap-MS with the fatty acyl composition considering the different possible combinations of the fatty acids

| Lipid name<br>TAG(C:N) | Fatty acyl chains                                                                                                                                                      | Formula<br>[M+NH <sub>4</sub> ] <sup>+</sup> | Observed Mass<br>[M+NH <sub>4</sub> ] <sup>+</sup> | Exact Mass<br>[M+NH <sub>4</sub> ] <sup>+</sup> | Mass error<br>(ppm) |
|------------------------|------------------------------------------------------------------------------------------------------------------------------------------------------------------------|----------------------------------------------|----------------------------------------------------|-------------------------------------------------|---------------------|
| TAG(40:0)              | 12:0-12:0-16:0 and 12:0-13:0-15:0 and 12:0-14:0-14:0 and 13:0-13:0-14:0                                                                                                | C43H86NO6                                    | 712.6446                                           | 712.6455                                        | -1.28               |
| TAG(41:0)              | 11:0-13:0-17:0 and 11:0-14:0-16:0 and 11:0-15:0-15:0 and 12:0-12:0-17:0 and 12:0-13:0-16:0 and 12:0-14:0-15:0 and 13:0-13:0-15:0 and 13:0-14:0-14:0                    | C44H88NO6                                    | 726.6595                                           | 726.6612                                        | -2.29               |
| TAG(42:1)              | 12:0-12:0-18:1 and 12:0-14:0-16:1 and 12:0-14:1-16:0 and 12:0-15:0-15:1 and 13:0-13:0-16:1 and 13:0-14:0-15:1 and 13:0-14:1-15:0 and 14:0-14:0-14:1                    | C45H88NO6                                    | 738.6597                                           | 738.6612                                        | -1.98               |
| TAG(42:0)              | 11:0-14:0-17:0 and 11:0-15:0-16:0 and 12:0-13:0-17:0 and 12:0-14:0-16:0 and 12:0-15:0-15:0 and 13:0-13:0-16:0 and 13:0-14:0-15:0 and 14:0-14:0-14:0                    | C45H90NO6                                    | 740.6758                                           | 740.6768                                        | -1.37               |
| TAG(43:1)              | 12:0-13:0-18:1 and 12:0-14:1-17:0 and 12:0-15:0-16:1 and 12:0-16:0-15:1 and 13:0-14:1-16:0 and 13:0-14:0-16:1 and 13:0-15:0-15:1 and 14:0-14:0-15:1 and 14:0-14:1-15:0 | C46H90NO6                                    | 752.6757                                           | 752.6768                                        | -1.48               |
| TAG(43:0)              | 12:0-14:0-17:0 and 12:0-15:0-16:0 and 13:0-13:0-17:0 and 13:0-14:0-16:0 and 13:0-15:0-15:0 and 14:0-14:0-15:0                                                          | C46H92NO6                                    | 754.6914                                           | 754.6925                                        | -1.41               |
| TAG(44:2)              | 12:0-14:1-18:1 and 13:0-15:1-16:1 and 12:0-16:1-16:1 and 14:0-14:1-16:1 and 14:0-15:1-15:1 and 14:1-15:0-15:1 and 12:0-14:0-18:2                                       | C47H90NO6                                    | 764.6763                                           | 764.6768                                        | -0.67               |
| TAG(44:1)              | 12:0-14:0-18:1 and 12:0-16:0-16:1 and 13:0-13:0-18:1 and 13:0-14:1-17:0 and 13:0-15:0-16:1 and 14:0-14:0-16:1 and 14:0-14:1-16:0 and 14:1-15:0-15:0                    | C47H92NO6                                    | 766.6916                                           | 766.6925                                        | -1.13               |

|            |                                                                                                                                                                                                  |           |          |          |       |
|------------|--------------------------------------------------------------------------------------------------------------------------------------------------------------------------------------------------|-----------|----------|----------|-------|
| TAG(44:0)  | 10:0-16:0-18:0 and 10:0-17:0-17:0 and 12:0-14:0-18:0 and 12:0-15:0-17:0 and 12:0-16:0-16:0 and 13:0-13:0-18:0 and 13:0-14:0-17:0 and 13:0-15:0-16:0 and 14:0-14:0-16:0 and <b>14:0-15:0-15:0</b> | C47H94NO6 | 768.7071 | 768.7081 | -1.32 |
| TAG(45:2)  | 12:0-15:1-18:1 and 13:0-14:1-18:1 and <b>15:0-14:1-16:1</b> and 15:0-15:1-15:1 and 14:1-17:0-14:1                                                                                                | C48H92NO6 | 778.6913 | 778.6925 | -1.49 |
| TAG(45:1)  | 12:0-16:0-17:1 and 13:0-15:0-17:1 and 13:0-16:0-16:1 and 14:0-14:0-17:1 and <b>14:0-15:0-16:1</b> and 14:0-15:1-16:0 and 15:0-15:0-15:1 and 14:1-15:0-16:0                                       | C48H94NO6 | 780.7065 | 780.7081 | -2.07 |
| TAG(45:0)  | 12:0-15:0-18:0 and 12:0-16:0-17:0 and 13:0-14:0-18:0 and 13:0-15:0-17:0 and 13:0-16:0-16:0 and 14:0-14:0-17:0 and <b>14:0-15:0-16:0</b> and 15:0-15:0-15:0                                       | C48H96NO6 | 782.7230 | 782.7238 | -0.98 |
| TAG(46:3)  | 14:1-14:1-18:1 and <b>14:1-16:1-16:1</b> and 15:1-15:1-16:1                                                                                                                                      | C49H92NO6 | 790.6922 | 790.6925 | -0.33 |
| TAG(46:2)  | 13:0-15:1-18:1 and 13:0-16:1-17:1 and 14:0-15:1-17:1 and 14:1-15:0-17:1 and <b>15:0-15:1-16:1</b> and 15:1-15:1-16:0 and 14:0-16:1-16:1 and 14:1-16:0-16:1                                       | C49H94NO6 | 792.7069 | 792.7081 | -1.53 |
| TAG(46:1)  | 14:0-14:0-18:1 and 14:0-14:1-18:0 and <b>14:0-16:0-16:1</b> and <b>14:1-16:0-16:0</b> and 15:0-15:0-16:1 and 15:0-15:1-16:0                                                                      | C49H96NO6 | 794.7226 | 794.7238 | -1.46 |
| TAG(46:0)  | 12:0-17:0-17:0 and 12:0-16:0-18:0 and 14:0-14:0-18:0 and 14:0-15:0-17:0 and <b>14:0-16:0-16:0</b> and <b>15:0-15:0-16:0</b>                                                                      | C49H98NO6 | 796.7386 | 796.7394 | -1.02 |
| TAG(47:3)* |                                                                                                                                                                                                  | C50H94NO6 | 804.7074 | 804.7081 | -0.89 |
| TAG(47:2)  | 13:0-16:1-18:1 and 13:0-17:1-17:1 and 14:0-15:0-18:2 and 14:0-15:1-18:1 and 14:0-16:1-17:1 and 14:1-15:0-18:1 and 15:0-15:1-17:1 and <b>15:0-16:1-16:1</b>                                       | C50H96NO6 | 806.7227 | 806.7238 | -1.32 |
| TAG(47:1)  | 13:0-16:0-18:1 and 13:0-17:0-17:1 and 14:0-15:0-18:1 and 14:0-16:0-17:1 and 14:0-16:1-17:0 and 15:0-15:0-17:1 and 15:0-15:1-17:0 and <b>15:0-16:0-16:1</b> and 15:1-16:0-16:0                    | C50H98NO6 | 808.7380 | 808.7394 | -1.75 |

|                  |                                                                                                                                                                                                                                                                              |            |          |          |       |
|------------------|------------------------------------------------------------------------------------------------------------------------------------------------------------------------------------------------------------------------------------------------------------------------------|------------|----------|----------|-------|
| <b>TAG(47:0)</b> | 13:0-16:0-18:0 and 13:0-17:0-17:0 and 14:0-15:0-18:0 and 14:0-16:0-17:0 and 15:0-15:0-17:0 and <b>15:0-16:0-16:0</b>                                                                                                                                                         | C50H100NO6 | 810.7541 | 810.7551 | -1.19 |
| <b>TAG(48:3)</b> | 12:0-18:1-18:2 and 14:0-16:2-18:1 and 14:0-16:1-18:2 and <b>14:1-16:1-18:1</b> and 14:1-17:1-17:1 and 15:0-15:1-18:2 and 15:0-16:2-17:1                                                                                                                                      | C51H96NO6  | 818.7231 | 818.7238 | -0.81 |
| <b>TAG(48:2)</b> | 14:0-16:1-18:1 and 14:1-16:0-18:1 and 15:0-15:1-18:1 and <b>16:0-16:1-16:1</b>                                                                                                                                                                                               | C51H98NO6  | 820.7386 | 820.7394 | -0.99 |
| <b>TAG(48:1)</b> | 14:0-16:0-18:1 and 15:0-15:0-18:1 and 15:0-16:0-17:1 and <b>16:0-16:0-16:1</b>                                                                                                                                                                                               | C51H100NO6 | 822.7544 | 822.7551 | -0.81 |
| <b>TAG(48:0)</b> | 12:0-16:0-20:0 and 12:0-17:0-19:0 and 12:0-18:0-18:0 and 13:0-15:0-20:0 and 13:0-16:0-19:0 and 13:0-17:0-18:0 and 14:0-14:0-20:0 and 14:0-15:0-19:0 and 14:0-16:0-18:0 and 14:0-17:0-17:0 and 15:0-15:0-18:0 and 15:0-16:0-17:0 and 15:0-15:0-18:0 and <b>16:0-16:0-16:0</b> | C51H102NO6 | 824.7700 | 824.7707 | -0.87 |
| <b>TAG(49:3)</b> | 14:1-17:1-18:1 and 15:0-16:1-18:2 and 15:0-16:2-18:1 and 15:1-16:1-18:1 and 15:1-17:1-17:1 and <b>16:1-16:1-17:1</b>                                                                                                                                                         | C52H98NO6  | 832.7384 | 832.7394 | -1.22 |
| <b>TAG(49:2)</b> | 14:0-17:0-18:2 and 15:0-16:0-18:2 and 15:0-16:1-18:1 and <b>15:1-16:0-18:1</b> and 15:1-17:0-17:1 and 16:1-16:1-17:0                                                                                                                                                         | C52H100NO6 | 834.7539 | 834.7551 | -1.39 |
| <b>TAG(49:1)</b> | 14:0-15:0-20:1 and 14:0-16:0-19:1 and 14:0-16:1-19:0 and 14:0-17:0-18:1 and 14:0-17:1-18:0 and 15:0-15:0-19:1 and 15:0-15:1-19:0 and <b>15:0-16:0-18:1</b> and 15:0-16:1-18:0 and 15:1-16:0-18:0 and 16:0-16:0-17:1 and 16:0-16:1-17:0                                       | C52H102NO6 | 836.7698 | 836.7707 | -1.09 |
| <b>TAG(49:0)</b> | 14:0-16:0-19:0 and 14:0-17:0-18:0 and 15:0-15:0-19:0 and 15:0-16:0-18:0 and 15:0-17:0-17:0 and <b>16:0-16:0-17:0</b>                                                                                                                                                         | C52H104NO6 | 838.7851 | 838.7864 | -1.51 |
| <b>TAG(50:4)</b> | 14:0-18:2-18:2 and 14:1-18:1-18:2 and <b>16:1-16:1-18:2</b> and 16:1-16:2-18:1                                                                                                                                                                                               | C53H98NO6  | 844.7388 | 844.7394 | -0.73 |
| <b>TAG(50:3)</b> | 16:0-16:0-18:3 and <b>16:0-16:1-18:2</b> and 16:1-16:1-18:1                                                                                                                                                                                                                  | C53H100NO6 | 846.7541 | 846.7551 | -1.14 |
| <b>TAG(50:2)</b> | <b>16:0-16:1-18:1</b> and 14:0-18:1-18:1 and 16:1-16:1-18:0                                                                                                                                                                                                                  | C53H102NO6 | 848.7708 | 848.7707 | 0.10  |

|            |                                                                                                                                                                                                                                                                         |            |          |          |       |
|------------|-------------------------------------------------------------------------------------------------------------------------------------------------------------------------------------------------------------------------------------------------------------------------|------------|----------|----------|-------|
| TAG(50:1)  | 14:0-16:0-20:1 and 14:0-18:0-18:1 and <b>16:0-16:0-18:1</b> and 16:0-16:1-18:0 and 16:0-17:0-17:1 and 16:1-17:0-17:0                                                                                                                                                    | C53H104NO6 | 850.7866 | 850.7864 | 0.28  |
| TAG(50:0)  | 14:0-14:0-22:0 and 14:0-16:0-20:0 and 14:0-17:0-19:0 and 14:0-18:0-18:0 and 15:0-15:0-20:0 and 15:0-16:0-19:0 and 15:0-17:0-18:0 and <b>16:0-16:0-18:0</b> and 16:0-17:0-17:0                                                                                           | C53H106NO6 | 852.8004 | 852.8020 | -1.89 |
| TAG(51:3)  | 15:0-16:1-20:2 and 15:0-17:1-19:2 and 15:0-18:1-18:2 and 15:1-16:0-20:2 and 15:1-17:0-19:2 and 15:1-18:1-18:1 and 16:0-16:1-19:2 and <b>16:0-17:1-18:2</b> and 16:0-18:1-17:2 and 17:0-17:1-17:2 and <b>16:1-17:0-18:2</b> and 17:1-17:1-17:1 and <b>16:1-17:1-18:1</b> | C54H102NO6 | 860.7699 | 860.7707 | -0.95 |
| TAG(51:2)  | 15:0-16:0-20:2 and 15:0-18:0-18:2 and 15:0-18:1-18:1 and 15:1-17:1-19:0 and 15:1-18:0-18:1 and <b>16:0-17:0-18:2</b> and <b>16:0-17:1-18:1</b> and 16:1-16:1-19:0 and 16:1-17:0-18:1 and 16:1-17:1-18:0 and 17:0-17:1-17:1                                              | C54H104NO6 | 862.7856 | 862.7864 | -0.89 |
| TAG(51:1)  | 14:0-17:0-20:1 and 14:0-18:0-19:1 and 15:0-16:0-20:1 and 15:0-17:0-19:1 and 15:0-18:0-18:1 and 16:0-16:0-19:1 and 16:0-17:1-18:0 and and <b>16:0-17:0-18:1</b> and 16:1-17:0-18:0 and 17:0-17:0-17:1                                                                    | C54H106NO6 | 864.8012 | 864.8020 | -0.94 |
| TAG(51:0)  | 14:0-17:0-20:0 and 14:0-18:0-19:0 and 15:0-16:0-20:0 and 15:0-17:0-19:0 and 15:0-18:0-18:0 and 16:0-16:0-19:0 and <b>16:0-17:0-18:0</b> and 17:0-17:0-17:0                                                                                                              | C54H108NO6 | 866.8158 | 866.8177 | -2.15 |
| TAG(52:4)  | 16:1-18:1-18:2 and <b>16:0-18:2-18:2</b>                                                                                                                                                                                                                                | C55H102NO6 | 872.7700 | 872.7707 | -0.82 |
| TAG(52:3)  | 16:0-18:1-18:2 and <b>16:1-18:1-18:1</b> and 16:0-16:1-20:2                                                                                                                                                                                                             | C55H104NO6 | 874.7866 | 874.7864 | 0.27  |
| TAG(52:2)  | <b>16:0-18:1-18:1</b> and 16:1-18:0-18:1                                                                                                                                                                                                                                | C55H106NO6 | 876.8027 | 876.8020 | 0.78  |
| TAG(52:1)  | 16:0-16:0-20:1 and 16:1-18:0-18:0 and <b>16:0-18:0-18:1</b>                                                                                                                                                                                                             | C55H108NO6 | 878.8169 | 878.8177 | -0.87 |
| TAG(52:0)  | 14:0-18:0-20:0 and 16:0-16:0-20:0 and <b>16:0-18:0-18:0</b>                                                                                                                                                                                                             | C55H110NO6 | 880.8319 | 880.8333 | -1.61 |
| TAG(53:6)* |                                                                                                                                                                                                                                                                         | C56H100NO6 | 882.7509 | 882.7551 | -4.72 |
| TAG(53:4)  | <b>17:1-18:1-18:2</b> and 17:2-18:1-18:1                                                                                                                                                                                                                                | C56H104NO6 | 886.7861 | 886.7864 | -0.30 |

|           |                                                                                                                                                                                                              |            |          |          |       |
|-----------|--------------------------------------------------------------------------------------------------------------------------------------------------------------------------------------------------------------|------------|----------|----------|-------|
| TAG(53:3) | 15:1-18:1-20:1 and 15:1-19:1-19:1 and 16:0-17:1-20:2 and 16:0-18:2-19:1 and 16:1-17:0-20:2 and 16:1-17:1-20:1 and 16:1-18:1-19:1 and 17:0-18:1-18:2 and 17:1-17:1-19:1 and 17:1-18:1-18:1                    | C56H106NO6 | 888.8013 | 888.8020 | -0.80 |
| TAG(53:2) | 15:0-18:1-20:1 and 16:0-18:1-19:1 and 16:0-17:1-20:1 and 16:1-17:0-20:1 and 17:0-17:1-19:1 and 17:0-18:1-18:1                                                                                                | C56H108NO6 | 890.8167 | 890.8177 | -1.08 |
| TAG(53:1) | 15:0-17:1-21:0 and 15:0-18:0-20:1 and 15:0-18:1-20:0 and 16:0-16:1-21:0 and 16:0-17:0-20:1 and 16:0-17:1-20:0 and 16:0-18:1-19:0 and 16:1-17:0-20:0 and 16:1-18:0-19:0 and 17:0-17:1-19:0 and 17:0-18:0-18:1 | C56H110NO6 | 892.8316 | 892.8333 | -1.92 |
| TAG(54:6) | 18:1-18:1-18:4 and 18:1-18:2-18:3 and 18:2-18:2-18:2                                                                                                                                                         | C57H102NO6 | 896.7697 | 896.7707 | -1.13 |
| TAG(54:5) | 18:1-18:1-18:3 and 18:1-18:2-18:2                                                                                                                                                                            | C57H104NO6 | 898.7859 | 898.7864 | -0.52 |
| TAG(54:4) | 16:0-18:1-20:3 and 16:0-18:2-20:2 and 16:0-18:3-20:1 and 16:1-18:0-20:3 and 16:1-18:1-20:2 and 16:1-18:2-20:1 and 16:2-18:0-20:2 and 16:2-18:1-20:1 and 18:0-18:1-18:3 and 18:0-18:2-18:2 and 18:1-18:1-18:2 | C57H106NO6 | 900.8021 | 900.8020 | 0.10  |
| TAG(54:3) | 16:0-18:1-20:2 and 16:0-18:2-20:1 and 16:1-18:0-20:2 and 16:1-18:1-20:1 and 18:0-18:1-18:2 and 18:1-18:1-18:1                                                                                                | C57H108NO6 | 902.8182 | 902.8177 | 0.59  |
| TAG(54:2) | 16:0-18:1-20:1 and 18:0-18:1-18:1 and 18:0-18:0-18:2                                                                                                                                                         | C57H110NO6 | 904.8333 | 904.8333 | -0.02 |
| TAG(54:1) | 14:0-20:0-20:1 and 16:0-18:0-20:1 and 16:0-18:1-20:0 and 16:1-18:0-20:0 and 18:0-18:0-18:1                                                                                                                   | C57H112NO6 | 906.8480 | 906.8490 | -1.06 |
| TAG(54:0) | 14:0-15:0-25:0 and 14:0-16:0-24:0 and 14:0-18:0-22:0 and 15:0-15:0-24:0 and 15:0-18:0-21:0 and 16:0-16:0-22:0 and 18:0-18:0-18:0                                                                             | C57H114NO6 | 908.8640 | 908.8646 | -0.68 |
| TAG(55:4) | 18:1-18:2-19:1                                                                                                                                                                                               | C58H108NO6 | 914.8184 | 914.8177 | 0.80  |



|            |                                                                                                                                                            |            |          |          |       |
|------------|------------------------------------------------------------------------------------------------------------------------------------------------------------|------------|----------|----------|-------|
| TAG(55:2)  | 16:0-19:1-20:1 and 17:0-18:1-20:1 and 17:0-19:1-19:1 and 17:1-18:0-20:1 and 17:1-18:1-20:0 and 17:1-19:0-19:1 and 18:0-18:1-19:1 and <b>18:1-18:1-19:0</b> | C58H112NO6 | 918.8482 | 918.8490 | -0.83 |
| TAG(55:1)  | 14:0-18:1-23:0 and <b>16:0-18:1-21:0</b> and and 16:1-18:0-21:0 and 17:0-18:1-20:0                                                                         | C58H114NO6 | 920.8642 | 920.8646 | -0.45 |
| TAG(56:5)  | 18:1-18:3-20:1                                                                                                                                             | C59H108NO6 | 926.8155 | 926.8177 | -2.33 |
| TAG(56:4)  | <b>18:1-18:1-20:2</b> and 18:1-18:2-20:1                                                                                                                   | C59H110NO6 | 928.8332 | 928.8333 | -0.12 |
| TAG(56:3)  | 18:1-18:1-20:1                                                                                                                                             | C59H112NO6 | 930.8482 | 930.8490 | -0.82 |
| TAG(56:2)  | 16:0-20:1-20:1 and 18:0-18:1-20:1 and <b>18:1-18:1-20:0</b>                                                                                                | C59H114NO6 | 932.8640 | 932.8646 | -0.66 |
| TAG(56:1)  | 16:0-16:1-24:0 and <b>16:0-18:1-22:0</b> and 16:1-18:0-22:0 and 16:1-20:0-20:0 and <b>18:0-18:1-20:0</b>                                                   | C59H116NO6 | 934.8802 | 934.8803 | -0.07 |
| TAG(57:5)* |                                                                                                                                                            | C60H110NO6 | 940.8334 | 940.8333 | 0.09  |
| TAG(57:4)* |                                                                                                                                                            | C60H112NO6 | 942.8490 | 942.8490 | 0.04  |
| TAG(57:3)* |                                                                                                                                                            | C60H114NO6 | 944.8640 | 944.8646 | -0.65 |
| TAG(57:2)  | 18:1-18:1-21:0                                                                                                                                             | C60H116NO6 | 946.8792 | 946.8803 | -1.12 |
| TAG(58:3)  | 18:1-18:2-22:0                                                                                                                                             | C61H116NO6 | 958.8793 | 958.8803 | -1.01 |
| TAG(58:2)  | 18:1-18:1-22:0                                                                                                                                             | C61H118NO6 | 960.8956 | 960.8959 | -0.33 |
| TAG(58:1)  | 16:0-16:1-26:0 and <b>16:0-18:1-24:0</b> and 18:0-18:1-22:0 and 18:1-20:0-20:0                                                                             | C61H120NO6 | 962.9106 | 962.9116 | -1.00 |
| TAG(60:3)  | 18:1-18:2-24:0                                                                                                                                             | C63H120NO6 | 986.9110 | 986.9116 | -0.57 |
| TAG(60:2)  | 18:1-18:1-24:0                                                                                                                                             | C63H122NO6 | 988.9265 | 988.9272 | -0.72 |

C:N means total number of carbons (C) and number of double bonds (N). \* means that species were confirmed by exact mass in the MS without MS/MS confirmation. The fatty acyl compositions in **bold** letters mean the major TAG species for the same  $m/z$  based on the abundance of the fragment ions in the MS/MS.

**Table S2)** List of polar lipids (phospholipids, glyceroglycolipids, glycosphingolipids and betaines) identified in the olive (*Olea europaea* L. cv. *Galega vulgar*) pulp by HILIC-LC-orbitrap-MS and HILIC-LC-orbitrap-MS/MS

| Lipid name<br>Class(C:N) | Acyl chain composition                            | Formula<br>[M+H] <sup>+</sup> | Observed Mass<br>[M+H] <sup>+</sup> | Exact Mass<br>[M+H] <sup>+</sup> | Mass error (ppm) |
|--------------------------|---------------------------------------------------|-------------------------------|-------------------------------------|----------------------------------|------------------|
| PC(24:0(OH))             | 16:0-8:0(OH)                                      | C32H65NO9P                    | 638.4399                            | 638.4397                         | 0.31             |
| PC(26:2)                 | 8:1-18:1                                          | C34H65NO8P                    | 646.4436                            | 646.4448                         | -1.86            |
| PC (16:0/C8CHO)*         | 16:0/C8CHO                                        | C33H65NO9P                    | 650.4400                            | 650.4397                         | 0.47             |
| PC(26:2(OH))             | 18:1-8:1(OH)                                      | C34H65NO9P                    | 662.4403                            | 662.4397                         | 0.91             |
| PC(26:1(OH))             | 18:1-8:0(OH)                                      | C34H67NO9P                    | 664.4585                            | 664.4553                         | 4.82             |
| PC (16:0/C8COOH)*        | 16:0/C8COOH                                       | C33H65NO10P                   | 666.4348                            | 666.4346                         | 0.28             |
| PC(27:2(OH))             | 18:1-9:1(OH)                                      | C35H67NO9P                    | 676.4560                            | 676.4553                         | 1.03             |
| PC(28:3(OH))             | 18:1-10:2(OH)                                     | C36H67NO9P                    | 688.4554                            | 688.4553                         | 0.15             |
| PC(30:3) <sup>a)</sup>   | 30:03:00                                          | C38H71NO8P                    | 700.4895                            | 700.4917                         | -3.14            |
| PC(29:2(OH))             | 18:1-11:1(OH)                                     | C37H71NO9P                    | 704.4867                            | 704.4866                         | 0.14             |
| PC(32:2)                 | 16:1-16:1                                         | C40H77NO8P                    | 730.5379                            | 730.5387                         | -1.10            |
| PC(32:1)                 | 16:0-16:1 and 14:0-18:1                           | C40H79NO8P                    | 732.5539                            | 732.5543                         | -0.55            |
| PC(32:2(OH))             | 16:0-16:2(OH) and 16:1-16:1(OH) and 18:1-14:1(OH) | C40H77NO9P                    | 746.5316                            | 746.5336                         | -2.68            |
| PC(33:1)                 | 16:0-17:1                                         | C41H81NO8P                    | 746.5671                            | 746.5700                         | -3.88            |
| PC(32:1(OH))             | 18:1-14:0(OH) and 16:0-16:1(OH)                   | C40H79NO9P                    | 748.5476                            | 748.5492                         | -2.20            |
| PC(34:4)                 | 16:1-18:3                                         | C42H77NO8P                    | 754.5372                            | 754.5387                         | -1.99            |
| PC(34:3)                 | 16:0-18:3 and 16:1-18:2                           | C42H79NO8P                    | 756.5545                            | 756.5543                         | 0.26             |
| PC(34:2)                 | 16:0-18:2 and 16:1-18:1                           | C42H81NO8P                    | 758.5699                            | 758.5700                         | -0.13            |
| PC(34:1)                 | 16:0-18:1                                         | C42H83NO8P                    | 760.5854                            | 760.5856                         | -0.26            |
| PC(34:4(OH))             | 17:1-17:3(OH) and 18:1-16:3(OH) and 18:2-16:2(OH) | C42H77NO9P                    | 770.5338                            | 770.5336                         | 0.26             |
| PC(35:3)                 | 18:2-17:1                                         | C43H81NO8P                    | 770.5697                            | 770.5700                         | -0.39            |

|               |                                                   |             |          |          |       |
|---------------|---------------------------------------------------|-------------|----------|----------|-------|
| PC(35:2)      | 18:1-17:1                                         | C43H83NO8P  | 772.5848 | 772.5856 | -1.04 |
| PC(34:3(OH))  | 16:0-18:3(OH) and 16:1-18:2(OH) and 18:1-16:2(OH) | C42H79NO9P  | 772.5487 | 772.5492 | -0.65 |
| PC(34:2(OH))  | 16:1-18:1(OH) and 16:0-18:2(OH) and 18:1-16:1(OH) | C42H81NO9P  | 774.5646 | 774.5649 | -0.39 |
| PC(35:1)      | 18:1-17:0                                         | C43H85NO8P  | 774.5998 | 774.6013 | -1.94 |
| PC(34:1(OH))  | 16:0-18:1(OH)                                     | C42H83NO9P  | 776.5799 | 776.5805 | -0.77 |
| PC(36:6)      | 18:3-18:3                                         | C44H77NO8P  | 778.538  | 778.5387 | -0.90 |
| PC(36:5)      | 18:3-18:2                                         | C44H79NO8P  | 780.5512 | 780.5543 | -3.97 |
| PC(36:4)      | 18:2-18:2 and 18:3-18:1                           | C44H81NO8P  | 782.5689 | 782.567  | 2.43  |
| PC(36:3)      | 18:1-18:2                                         | C44H83NO8P  | 784.5853 | 784.5856 | -0.38 |
| PC(36:2)      | 18:1-18:1                                         | C44H85NO8P  | 786.6009 | 786.6013 | -0.51 |
| PC(34:1(2OH)) | 16:0-18:1(2OH)                                    | C42H83NO10P | 792.5756 | 792.5755 | 0.13  |
| PC(36:5(OH))  | 18:2-18:3(OH)                                     | C44H79NO9P  | 796.5476 | 796.5492 | -2.01 |
| PC(37:4)      | 18:1-19:3 and 18:2-19:2                           | C45H83NO8P  | 796.5829 | 796.5856 | -3.39 |
| PC(36:4(OH))  | 18:1-18:3(OH) and 18:2-18:2(OH)                   | C44H81NO9P  | 798.5647 | 798.5649 | -0.25 |
| PC(36:3(OH))  | 18:1-18:2(OH) and 18:2-18:1(OH)                   | C44H83NO9P  | 800.5798 | 800.5805 | -0.87 |
| PC(37:2)      | 19:0-18:2 and 18:1-19:1                           | C45H87NO8P  | 800.6156 | 800.6169 | -1.62 |
| PC(36:2(OH))  | 18:1-18:1(OH)                                     | C44H85NO9P  | 802.5949 | 802.5962 | -1.62 |
| PC(38:3)      | 18:1-20:2 and 18:2-20:1                           | C46H87NO8P  | 812.614  | 812.6169 | -3.57 |
| PC(38:2)      | 18:1-20:1                                         | C46H89NO8P  | 814.6318 | 814.6326 | -0.98 |
| PC(38:1)      | 18:1-20:0                                         | C46H91NO8P  | 816.6452 | 816.6482 | -3.67 |
| PC(36:3(2OH)) | 18:1-18:2(2OH)                                    | C44H83NO10P | 816.5755 | 816.5755 | 0.00  |
| PC(36:2(2OH)) | 18:1-18:1(2OH)                                    | C44H85NO10P | 818.5908 | 818.5911 | -0.37 |
| PC(40:2)      | 18:1-22:1 and 18:2-22:0                           | C48H93NO8P  | 842.6611 | 842.6639 | -3.32 |
| PC(40:1)      | 18:1-22:0                                         | C48H95NO8P  | 844.6812 | 844.6795 | 2.01  |
| PC(41:1)      | 18:1-23:0                                         | C49H97NO8P  | 858.6943 | 858.6952 | -1.05 |
| PC(42:1)      | 18:1-24:0                                         | C50H99NO8P  | 872.7111 | 872.7108 | 0.34  |

|                        |                                       |                          |                          |                          |       |
|------------------------|---------------------------------------|--------------------------|--------------------------|--------------------------|-------|
| PC(43:1)               | 18:1-25:0                             | C51H101NO8P              | 886.7261                 | 886.7265                 | -0.45 |
|                        |                                       | <b>[M+H]<sup>+</sup></b> | <b>[M+H]<sup>+</sup></b> | <b>[M+H]<sup>+</sup></b> |       |
| LPC(16:1)              | 16:1                                  | C24H49NO7P               | 494.3245                 | 494.3247                 | -0.40 |
| LPC(16:0)              | 16:0                                  | C24H51NO7P               | 496.3402                 | 496.3403                 | -0.20 |
| LPC(18:3)              | 18:3                                  | C26H49NO7P               | 518.3224                 | 518.3247                 | -4.44 |
| LPC(18:2)              | 18:2                                  | C26H51NO7P               | 520.3404                 | 520.3403                 | 0.19  |
| LPC(18:1)              | 18:1                                  | C26H53NO7P               | 522.3559                 | 522.3560                 | -0.19 |
| LPC(18:2(OH))          | 18:2(OH)                              | C26H51NO8P               | 536.3355                 | 536.3352                 | 0.56  |
| LPC(18:1(OH))          | 18:1(OH)                              | C26H53NO8P               | 538.3511                 | 538.3509                 | 0.37  |
| LPC(20:1)              | 20:1                                  | C28H57NO7P               | 550.3876                 | 550.3873                 | 0.61  |
| LPC(20:0)              | 20:0                                  | C28H59NO7P               | 552.4025                 | 552.4029                 | -0.75 |
| LPC(18:1(2OH))         | 18:1(2OH)                             | C26H53NO9P               | 554.3457                 | 554.3458                 | -0.18 |
| LPC(22:0)              | 22:0                                  | C30H63NO7P               | 580.4359                 | 580.4342                 | 2.90  |
| LPC(24:0)              | 24:0                                  | C32H67NO7P               | 608.4664                 | 608.4655                 | 1.45  |
|                        |                                       | <b>[M+H]<sup>+</sup></b> | <b>[M+H]<sup>+</sup></b> | <b>[M+H]<sup>+</sup></b> |       |
| PE(30:3) <sup>a)</sup> |                                       | C35H65NO8P               | 658.4426                 | 658.4448                 | -3.31 |
| PE(34:2)               | 16:1-18:1 and 16:0-18:2               | C39H75NO8P               | 716.5216                 | 716.5230                 | -2.00 |
| PE(34:1)               | 16:0-18:1                             | C39H77NO8P               | 718.5380                 | 718.5387                 | -0.97 |
| PE(36:4) <sup>*</sup>  |                                       | C41H75NO8P               | 740.5216                 | 740.5230                 | -1.93 |
| PE(36:3)               | 18:1-18:2                             | C41H77NO8P               | 742.5388                 | 742.5387                 | 0.13  |
| PE(36:2)               | 18:1-18:1 and 18:0-18:2 and 17:1-19:1 | C41H79NO8P               | 744.5538                 | 744.5543                 | -0.67 |
|                        |                                       | <b>[M-H]<sup>-</sup></b> | <b>[M-H]<sup>-</sup></b> | <b>[M-H]<sup>-</sup></b> |       |
| PG(34:1)               | 16:0-18:1                             | C40H76O10P               | 747.5175                 | 747.5176                 | -0.13 |
| PG(36:2) <sup>*</sup>  |                                       | C42H78O10P               | 773.5332                 | 773.5333                 | -0.13 |
|                        |                                       | <b>[M+H]<sup>+</sup></b> | <b>[M+H]<sup>+</sup></b> | <b>[M+H]<sup>+</sup></b> |       |
| SM(d34:1)              |                                       | C39H80N2O6P              | 703.5755                 | 703.5754                 | 0.14  |

|             |                         |                                       |                                       |                                       |       |
|-------------|-------------------------|---------------------------------------|---------------------------------------|---------------------------------------|-------|
| SM(d36:1)   |                         | C41H84N2O6P                           | 731.6054                              | 731.6067                              | -1.78 |
| SM(t38:1)*  |                         | C43H88N2O7P                           | 775.6330                              | 775.6329                              | 0.13  |
| SM(d41:1)   |                         | C46H94N2O6P                           | 801.6875                              | 801.6850                              | 3.12  |
| SM(t40:0)   |                         | C45H94N2O7P                           | 805.6792                              | 805.6799                              | -0.87 |
| SM(d42:2)   |                         | C47H94N2O6P                           | 813.6870                              | 813.6850                              | 2.52  |
| SM(d42:1)   |                         | C47H96N2O6P                           | 815.6969                              | 815.7006                              | -4.54 |
| SM(t41:1)*  |                         | C46H94N2O7P                           | 817.6834                              | 817.6799                              | 4.28  |
| SM(t41:0)   |                         | C46H96N2O7P                           | 819.6953                              | 819.6955                              | -0.24 |
|             |                         | <b>[M+NH<sub>4</sub>]<sup>+</sup></b> | <b>[M+NH<sub>4</sub>]<sup>+</sup></b> | <b>[M+NH<sub>4</sub>]<sup>+</sup></b> |       |
| MGDG(34:4)  | 16:1-18:3               | C43H78NO10                            | 768.5644                              | 768.5626                              | 2.34  |
| MGDG(34:2)* |                         | C43H82NO10                            | 772.5932                              | 772.5939                              | -0.87 |
| MGDG(34:1)* |                         | C43H84NO10                            | 774.6076                              | 774.6095                              | -2.48 |
| MGDG(36:6)  | 18:3-18:3 and 18:4-18:2 | C45H78NO10                            | 792.5622                              | 792.5626                              | -0.50 |
| MGDG(36:4)  | 18:2-18:2 and 18:3-18:1 | C45H82NO10                            | 796.5934                              | 796.5939                              | -0.63 |
| MGDG(36:3)  | 18:1-18:2 and 18:3-18:0 | C45H84NO10                            | 798.6091                              | 798.6095                              | -0.50 |
| MGDG(36:2)  | 18:1-18:1               | C45H86NO10                            | 800.6250                              | 800.6251                              | -0.15 |
| MGDG(38:1)* |                         | C47H92NO10                            | 830.6714                              | 830.6721                              | -0.87 |
| MGDG(40:4)* |                         | C49H90NO10                            | 852.6562                              | 852.6565                              | -0.32 |
|             |                         | <b>[M+NH<sub>4</sub>]<sup>+</sup></b> | <b>[M+NH<sub>4</sub>]<sup>+</sup></b> | <b>[M+NH<sub>4</sub>]<sup>+</sup></b> |       |
| DGMG(18:3)* | 18:03                   | C33H60NO14                            | 694.4022                              | 694.4014                              | 1.18  |
| DGMG(18:1)* | 18:01                   | C33H64NO14                            | 698.4317                              | 698.4327                              | -1.41 |
|             |                         | <b>[M+NH<sub>4</sub>]<sup>+</sup></b> | <b>[M+NH<sub>4</sub>]<sup>+</sup></b> | <b>[M+NH<sub>4</sub>]<sup>+</sup></b> |       |
| DGDG(34:4)* |                         | C49H88NO15                            | 930.6154                              | 930.6154                              | 0.00  |
| DGDG(34:3)  | 16:0-18:3               | C49H90NO15                            | 932.6315                              | 932.6310                              | 0.54  |
| DGDG(34:2)  | 16:1-18:1 and 16:0-18:2 | C49H92NO15                            | 934.6437                              | 934.6467                              | -3.21 |
| DGDG(34:1)  | 16:0-18:1               | C49H94NO15                            | 936.6621                              | 936.6623                              | -0.21 |

|                                   |                                 |                          |                          |                          |       |
|-----------------------------------|---------------------------------|--------------------------|--------------------------|--------------------------|-------|
| DGDG(36:6)                        | 18:3-18:3 and 18:4-18:2         | C51H88NO15               | 954.6150                 | 954.6154                 | -0.42 |
| DGDG(36:4)                        | 18:1-18:3 and 18:2-18:2         | C51H92NO15               | 958.6467                 | 958.6467                 | 0.00  |
| DGDG(36:3)                        | 18:2-18:1 and 18:0-18:3         | C51H94NO15               | 960.6582                 | 960.6623                 | -4.27 |
| DGDG(36:2)                        | 18:1-18:1 and 18:2-18:0         | C51H96NO15               | 962.6775                 | 962.6780                 | -0.52 |
|                                   |                                 | <b>[M+H]<sup>+</sup></b> | <b>[M+H]<sup>+</sup></b> | <b>[M+H]<sup>+</sup></b> |       |
| HexCer(d34:2(OH))                 | d18:2-16:0-OH                   | C40H76NO9                | 714.5518                 | 714.5520                 | -0.28 |
| HexCer(d34:1(OH))                 | d18:1-16:0-OH                   | C40H78NO9                | 716.5669                 | 716.5676                 | -0.98 |
| HexCer(t40:1(OH))                 | t18:1-22:0-OH                   | C46H90NO10               | 816.6555                 | 816.6565                 | -1.22 |
| HexCer(t42:1(OH))                 | t18:1-24:0-OH                   | C48H94NO10               | 844.6874                 | 844.6878                 | -0.47 |
| HexCer(t44:1((OH) <sub>2</sub> )) | t18:1-26:0-((OH) <sub>2</sub> ) | C50H98NO10               | 872.7195                 | 872.7191                 | 0.49  |
|                                   |                                 | <b>[M+H]<sup>+</sup></b> | <b>[M+H]<sup>+</sup></b> | <b>[M+H]<sup>+</sup></b> |       |
| MGTS(16:0)                        | 16:0                            | C26H52O6N                | 474.3793                 | 474.3795                 | -0.42 |
|                                   |                                 | <b>[M+H]<sup>+</sup></b> | <b>[M+H]<sup>+</sup></b> | <b>[M+H]<sup>+</sup></b> |       |
| DGTS(34:2)                        | 16:0-18:2 and 16:1-18:1         | C44H82O7N                | 736.6082                 | 736.6091                 | -1.22 |
| DGTS(34:1)                        | 16:0-18:1                       | C44H84O7N                | 738.6213                 | 738.6248                 | -4.74 |
| DGTS(36:4)                        | 18:2-18:2                       | C46H82O7N                | 760.6095                 | 760.6091                 | 0.53  |
| DGTS(36:3)                        | 18:2-18:1                       | C46H84O7N                | 762.6238                 | 762.6248                 | -1.31 |
| DGTS(36:2)                        | 18:1-18:1                       | C46H86O7N                | 764.6404                 | 764.6404                 | 0.00  |

Abbreviations: PC, phosphatidylcholine; LPC, lyso-phosphatidylcholine; PE, phosphatidylethanolamine; PG, phosphatidylglycerol; SM: sphingomyelin; MGDG, monoglycosyldiacylglycerol; DGMG, diglycosylmonoacylglycerol; DGDG, diglycosyldiacylglycerol; HexCer, hexosylceramide; MGTS, monoacylglyceryl-N,N,N-trimethylhomoserine; DGTS, diacylglyceryl-N,N,N-trimethylhomoserine.

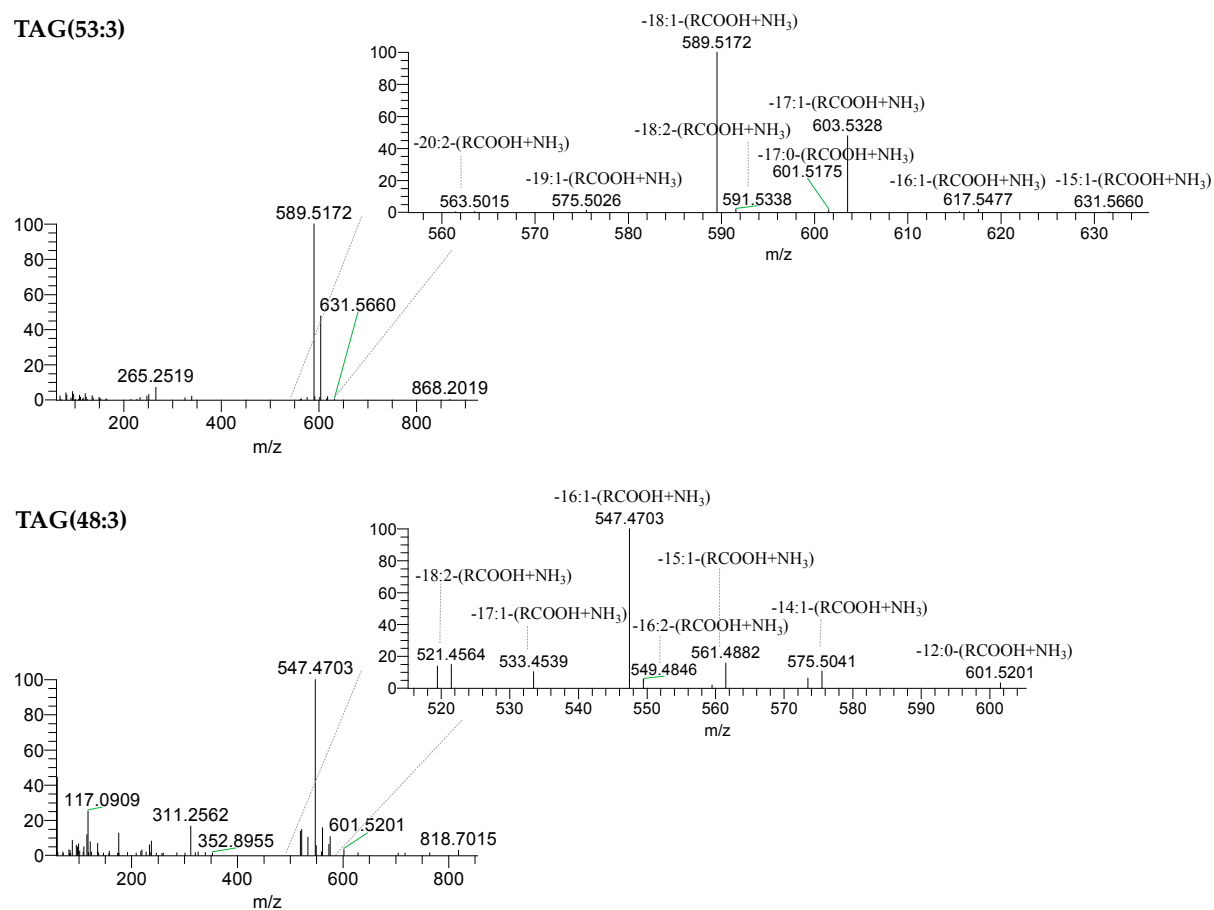

**Figure S2)** LC-MS/MS spectra of two molecular species of triacylglycerol identified in the olive (*Olea europaea* L. cv. *Galega vulgar*) pulp in the positive ion mode as  $[M+NH_4]^+$  ions, bearing unusual fatty acids. In this MS/MS spectrum of TAG(53:3), several neutral losses of the acyl chains as RCOOH+NH<sub>3</sub> ions are seen, including neutral losses of the unusual odd-fatty acids 15:1, 17:1 and 19:1. In this MS/MS spectrum of TAG(48:3), neutral losses of the acyl chains of unusual odd- and polyunsaturated fatty acids are seen, as 15:1 and 16:2, respectively.

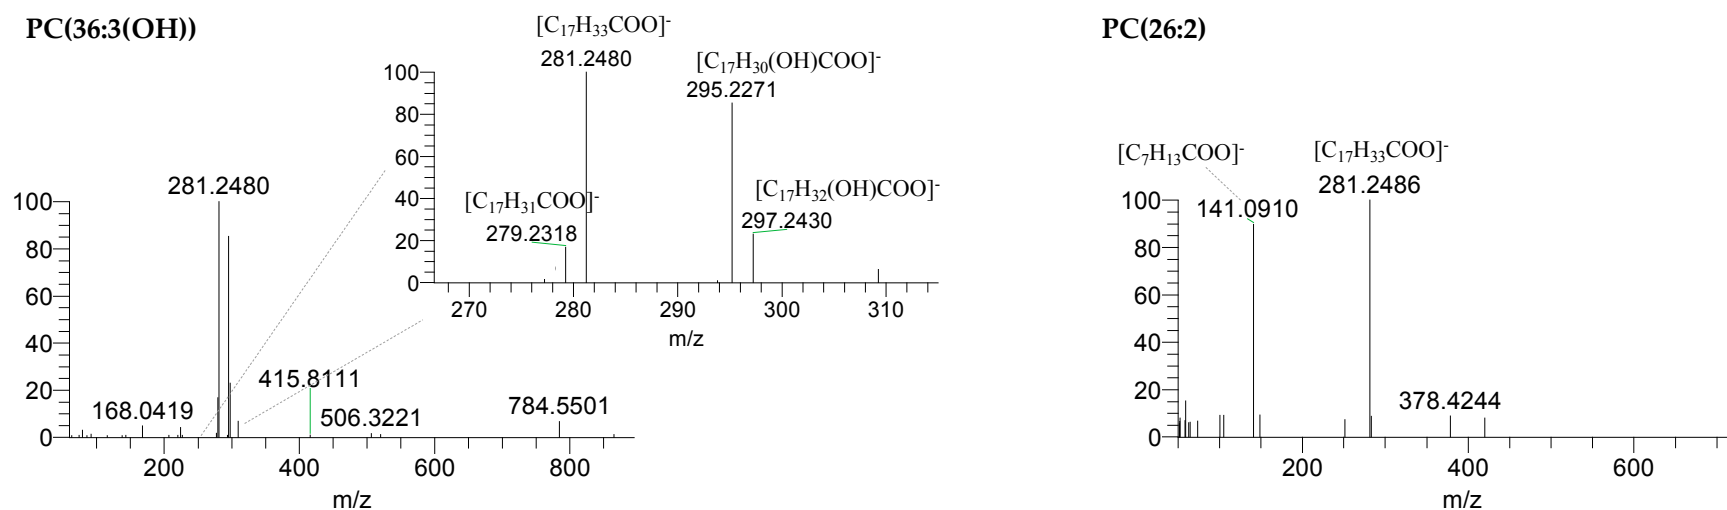

**Figure S3)** LC-MS/MS spectra of two molecular species of phosphatidylcholine (PC) identified in the olive (*Olea europaea* L. cv. *Galega vulgar*) pulp in the negative ion mode as  $[M+CH_3COO]^-$  ions, bearing unusual fatty acids. In the MS/MS spectrum of PC(36:3(OH)) on the left, the carboxylate anions corresponding to the fatty acids C18:1 at  $m/z$  281.24, C18:2 at  $m/z$  279.23, C18:2(OH) at  $m/z$  295.22 and C18:1(OH) at  $m/z$  297.24 are seen. In the MS/MS spectrum of PC(26:2) on the right, the carboxylate anions corresponding to the fatty acids C8:1 at  $m/z$  141.09 and C18:1 at  $m/z$  281.24 are seen.
